# Supplementary material
Source: PubMed Central journal article supplement (PMC6067126)
Supplement: bgy071_suppl_supplement_figures.pdf [file bgy071_suppl_supplement_figures.pdf]

## Supplementary Data 2

### Tocopherols inhibit estrogen-induced cancer stemness and OCT4 signaling in breast cancer

Min Ji Bak<sup>1</sup>, Philip Furmanski<sup>1</sup>, Naing Lin Shan<sup>1</sup>, Hong Jin Lee<sup>2</sup>, Cheng Bao<sup>2</sup>, Yong Lin<sup>3,4</sup>, Weichung Joe Shih<sup>3,4</sup>, Chung S, Yang<sup>1,4</sup>, and Nanjoo Suh<sup>1,4,\*</sup>

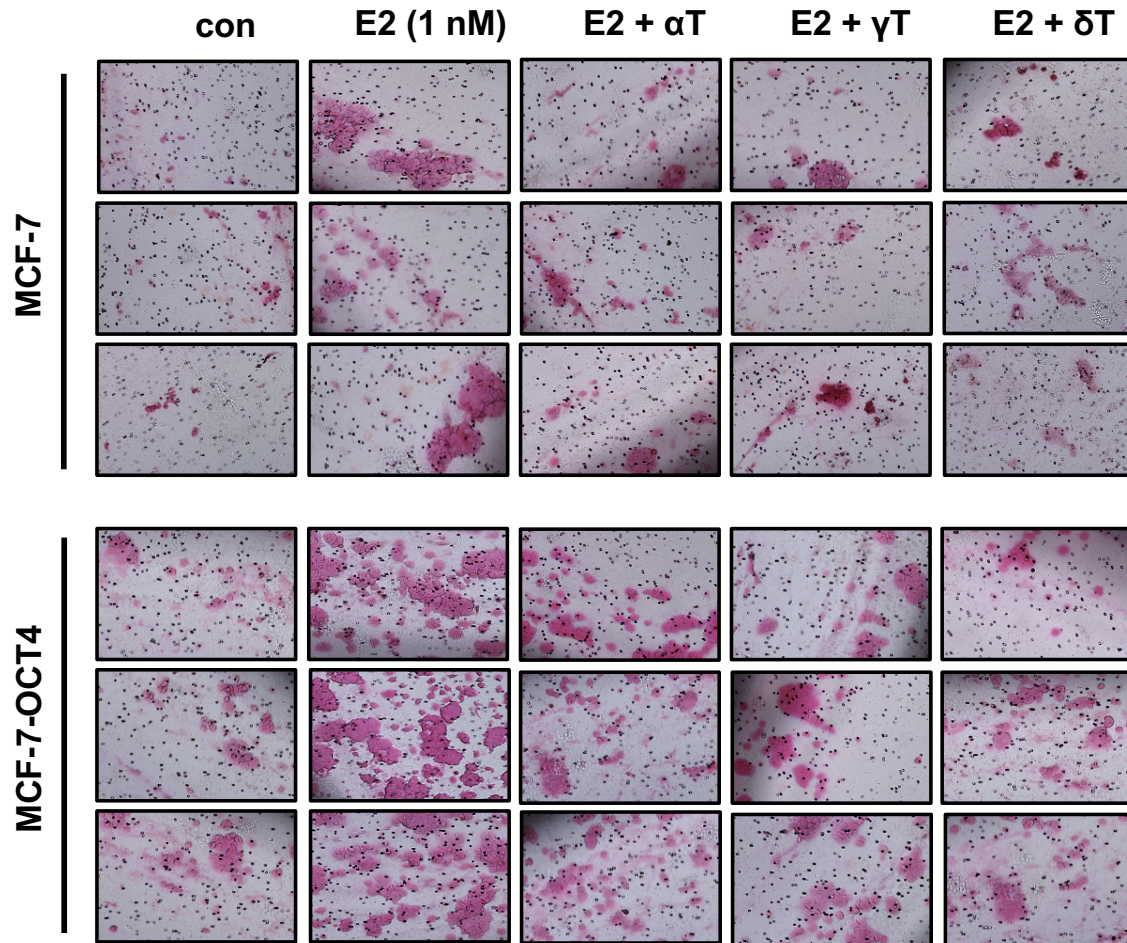

**Supplementary Figure S2.** Tocopherols inhibit cell invasion induced by estrogen and OCT4. Cells were transfected with control vector (MCF-7) and pSin-EF2-OCT4-Pur vector (MCF-7-OCT4) for 24 h and then cells were treated with estrogen (E2, 1 nM) and/or α-, γ-, δ-tocopherol (1 μM) for an additional 24 h. Cells (8x10<sup>4</sup> cells/mL) were loaded onto transwells coated with matrigel. After 22 h incubation, the transwells were stained with H&E stain. Representative pictures are shown, 10X magnification.

# Supplementary Data 3

## Tocopherols inhibit estrogen-induced cancer stemness and OCT4 signaling in breast cancer

Min Ji Bak<sup>1</sup>, Philip Furmanski<sup>1</sup>, Naing Lin Shan<sup>1</sup>, Hong Jin Lee<sup>2</sup>, Cheng Bao<sup>2</sup>, Yong Lin<sup>3,4</sup>, Weichung Joe Shih<sup>3,4</sup>, Chung S, Yang<sup>1,4</sup>, and Nanjoo Suh<sup>1,4,\*</sup>

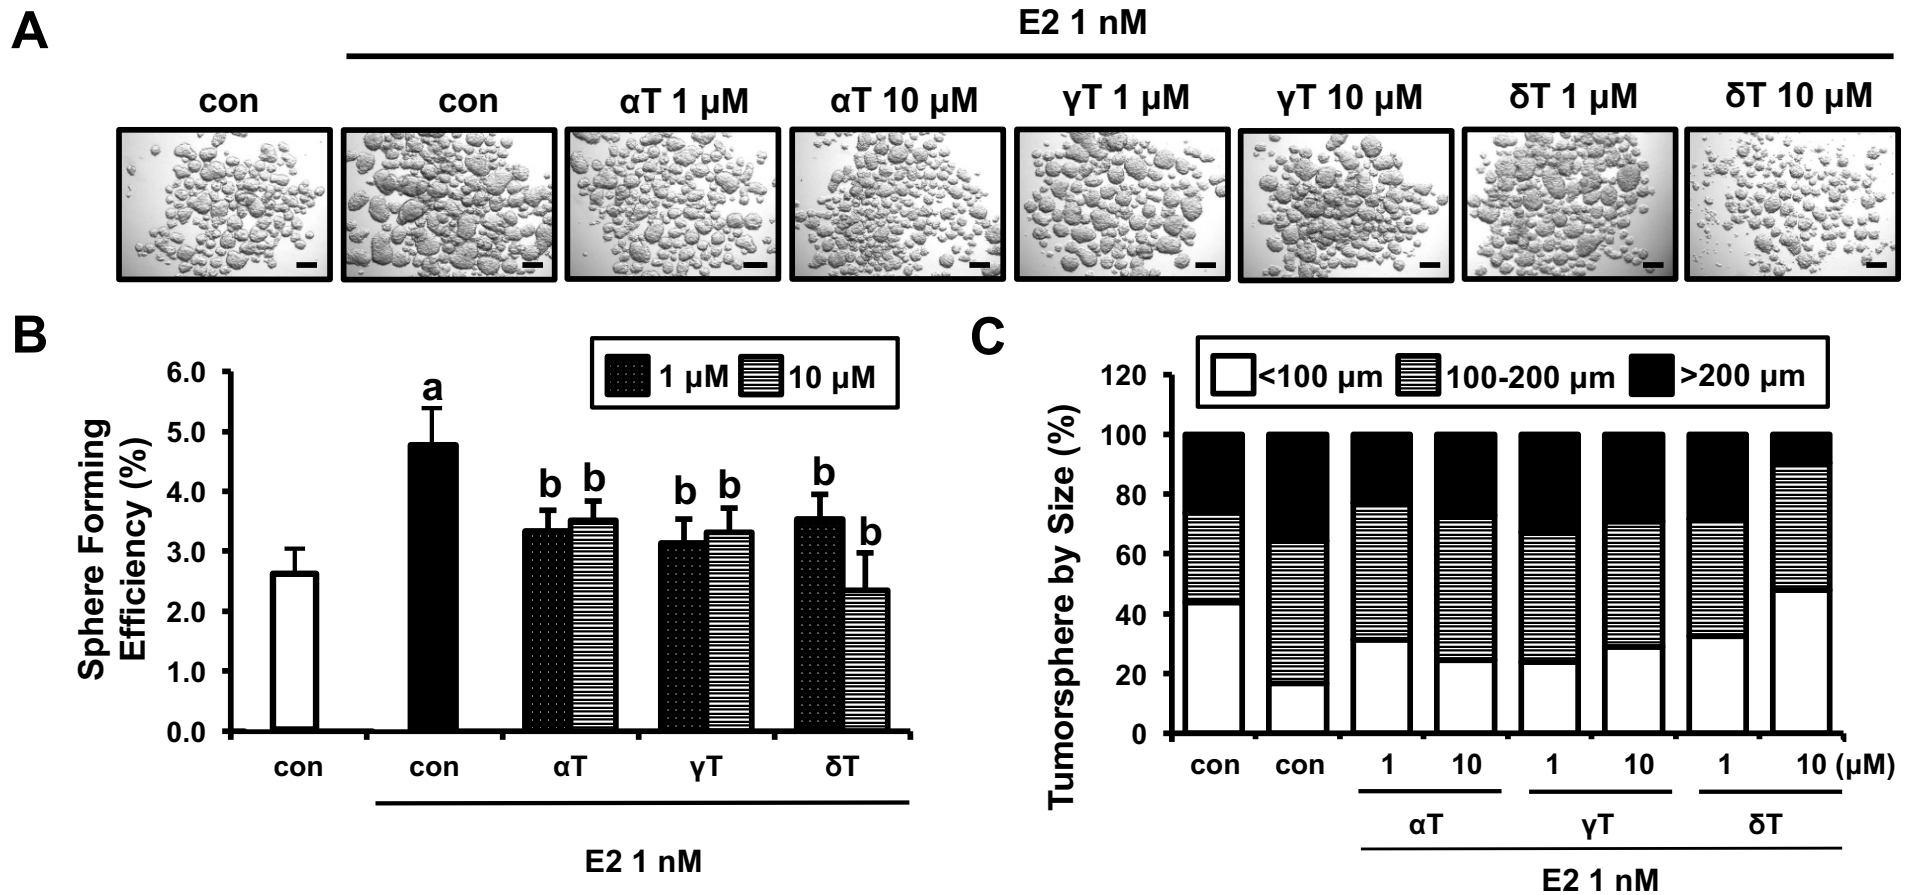

**Supplementary Figure S3.** Effects of tocopherols on formation and size of MCF-7 tumorspheres. (A) MCF-7 cells were plated at a density of 10,000 cells/mL in ultra-low attachment 6-well plates and grown for 4 days in the presence of estrogen (E2, 1 nM) or/and  $\alpha$ -,  $\gamma$ -,  $\delta$ -tocopherol (1 and 10  $\mu$ M). Representative pictures of MCF-7 tumorspheres are shown for phenotypic comparison, scale bar 100  $\mu$ m. (B) Sphere forming efficiency (SFE) of MCF-7 tumorspheres is shown. SFE was calculated by dividing the number of tumorspheres (>100  $\mu$ m) formed by the number of cells seeded presenting this as a percentage. The data are represented as mean  $\pm$  SD.  $n=2$  independent experiments in triplicate, <sup>a,b</sup> Significantly different from the control and E2, respectively ( $p<0.05$ ). (C) The size of tumorspheres was divided into three ranges (<100, 100-200 and >200  $\mu$ m). Average number of tumorspheres in each size range is shown in the graph.

# Supplementary Data 4

## Tocopherols inhibit estrogen-induced cancer stemness and OCT4 signaling in breast cancer

Min Ji Bak<sup>1</sup>, Philip Furmanski<sup>1</sup>, Naing Lin Shan<sup>1</sup>, Hong Jin Lee<sup>2</sup>, Cheng Bao<sup>2</sup>, Yong Lin<sup>3,4</sup>, Weichung Joe Shih<sup>3,4</sup>, Chung S, Yang<sup>1,4</sup>, and Nanjoo Suh<sup>1,4,\*</sup>

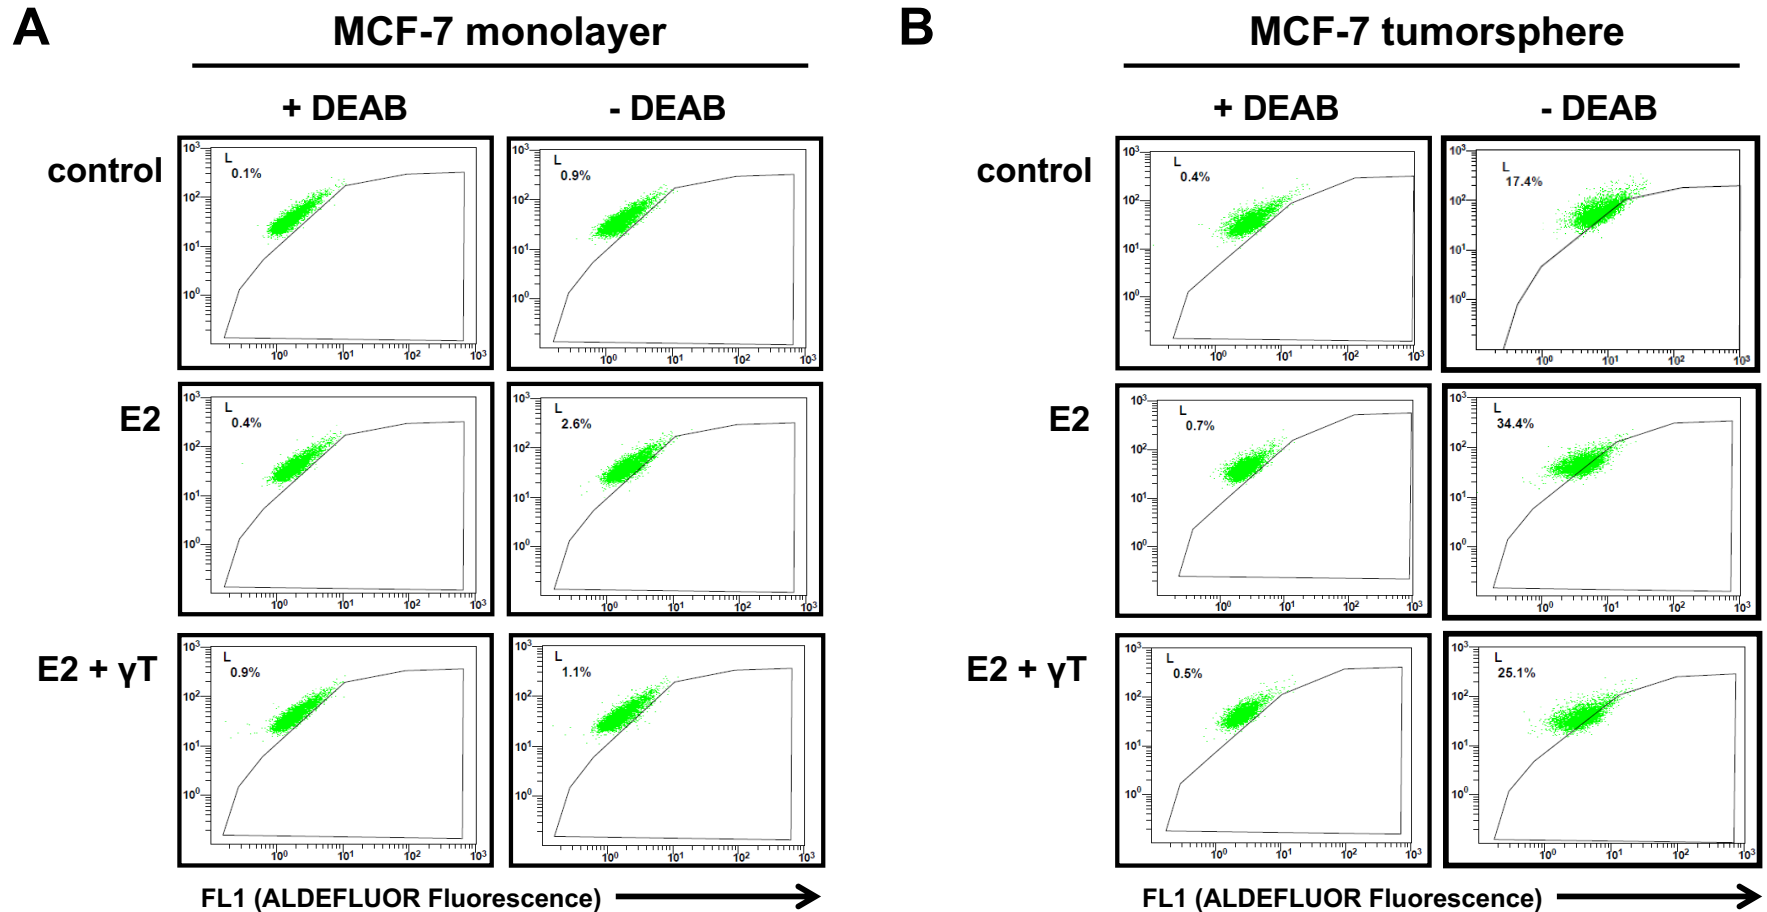

**Supplementary Figure S4.** Effects of  $\gamma$ -tocopherol on ALDH activity in MCF-7 monolayer and tumorspheres. (A) MCF-7 monolayer cells were treated with estrogen (E2, 1 nM) and  $\gamma$ -tocopherol (1  $\mu$ M) for 24 h. (B) MCF-7 tumorspheres were formed by plating 10,000 cells/mL in ultra-low attachment 6-well plates and treated with E2 (1 nM) and  $\gamma$ -tocopherol (1  $\mu$ M) for 4 days. Cells were assayed with ALDEFLUOR assay kit as per the manufacturer's guidelines. As a negative control for all experiments, cells were incubated with diethylaminobenzaldehyde (DEAB), a specific ALDH inhibitor. Experiments were performed in triplicate and representative histograms from flow cytometry are shown.

# Supplementary Data 5

## Tocopherols inhibit estrogen-induced cancer stemness and OCT4 signaling in breast cancer

Min Ji Bak<sup>1</sup>, Philip Furmanski<sup>1</sup>, Naing Lin Shan<sup>1</sup>, Hong Jin Lee<sup>2</sup>, Cheng Bao<sup>2</sup>, Yong Lin<sup>3,4</sup>, Weichung Joe Shih<sup>3,4</sup>, Chung S, Yang<sup>1,4</sup>, and Nanjoo Suh<sup>1,4,\*</sup>

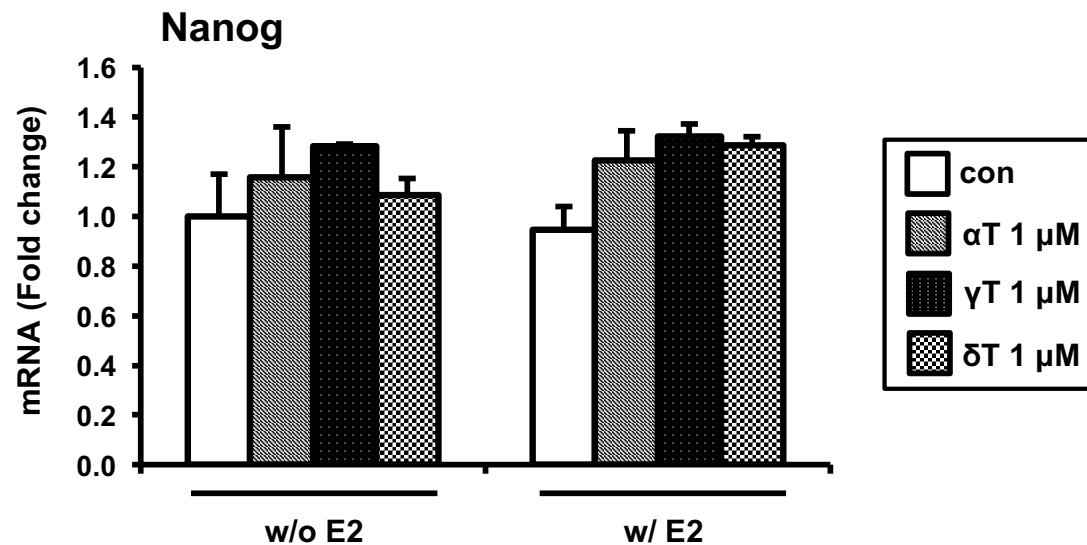

**Supplementary Figure S5.** Effects of estrogen and/or tocopherols on the mRNA level of Nanog in MCF-7 tumorspheres. qPCR analysis was performed on MCF-7 tumorspheres collected from 4 days of treatment with estrogen (E2, 1 nM) and/or tocopherols (1  $\mu$ M), and analyzed for Nanog. Cycle numbers for control group were 30. The data are represented as mean  $\pm$  SD. n=3 independent experiments.

# Supplementary Data 6

## Tocopherols inhibit estrogen-induced cancer stemness and OCT4 signaling in breast cancer

Min Ji Bak<sup>1</sup>, Philip Furmanski<sup>1</sup>, Naing Lin Shan<sup>1</sup>, Hong Jin Lee<sup>2</sup>, Cheng Bao<sup>2</sup>, Yong Lin<sup>3,4</sup>, Weichung Joe Shih<sup>3,4</sup>, Chung S, Yang<sup>1,4</sup>, and Nanjoo Suh<sup>1,4,\*</sup>

### A. Exp 1.1

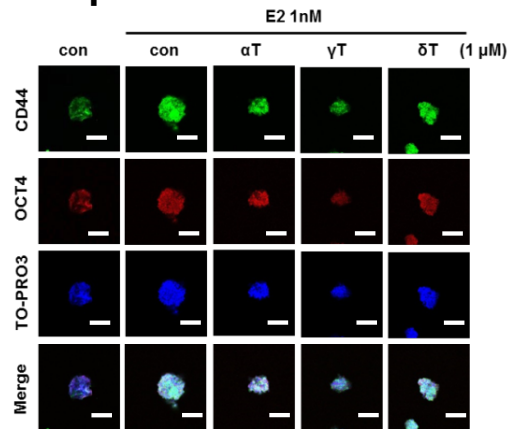

### B. Exp 1.2

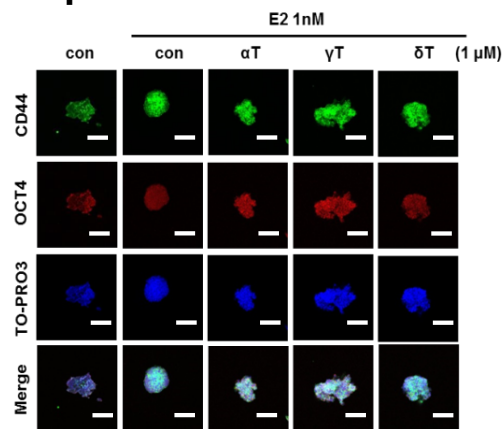

### C. Exp 2.1

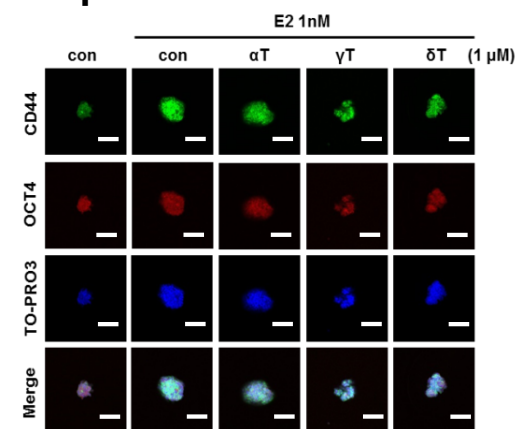

### D. Exp 2.2

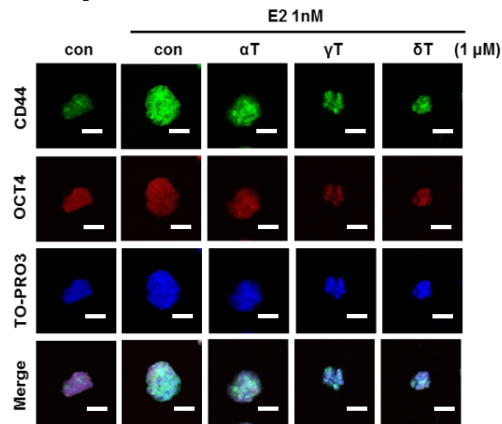

### E. Exp 3.1

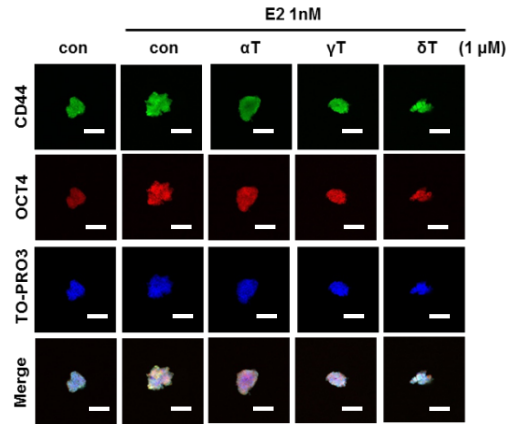

### F. Exp 3.2

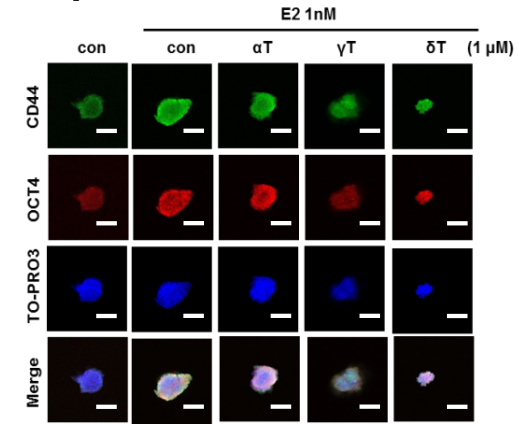

**Supplementary Figure S6.** Effects of tocopherols on expression of CD44 and OCT4 in estrogen-treated MCF-7 tumorspheres. Immunofluorescence analysis was performed on MCF-7 tumorspheres collected from 4 days of treatment with control, estrogen (E2, 1 nM) or tocopherols (1 μM). MCF-7 tumorspheres were fixed using 4% paraformaldehyde and stained with antibodies against CD44 (green) and OCT4 (red). Nuclei were stained with TO-PRO3 (blue). Three independent experiments in duplicate were performed and shown as A, B, C, D, E and F. Scale bars: 200 μm.

# Supplementary Data 7

## Tocopherols inhibit estrogen-induced cancer stemness and OCT4 signaling in breast cancer

Min Ji Bak<sup>1</sup>, Philip Furmanski<sup>1</sup>, Naing Lin Shan<sup>1</sup>, Hong Jin Lee<sup>2</sup>, Cheng Bao<sup>2</sup>, Yong Lin<sup>3,4</sup>, Weichung Joe Shih<sup>3,4</sup>, Chung S, Yang<sup>1,4</sup>, and Nanjoo Suh<sup>1,4,\*</sup>

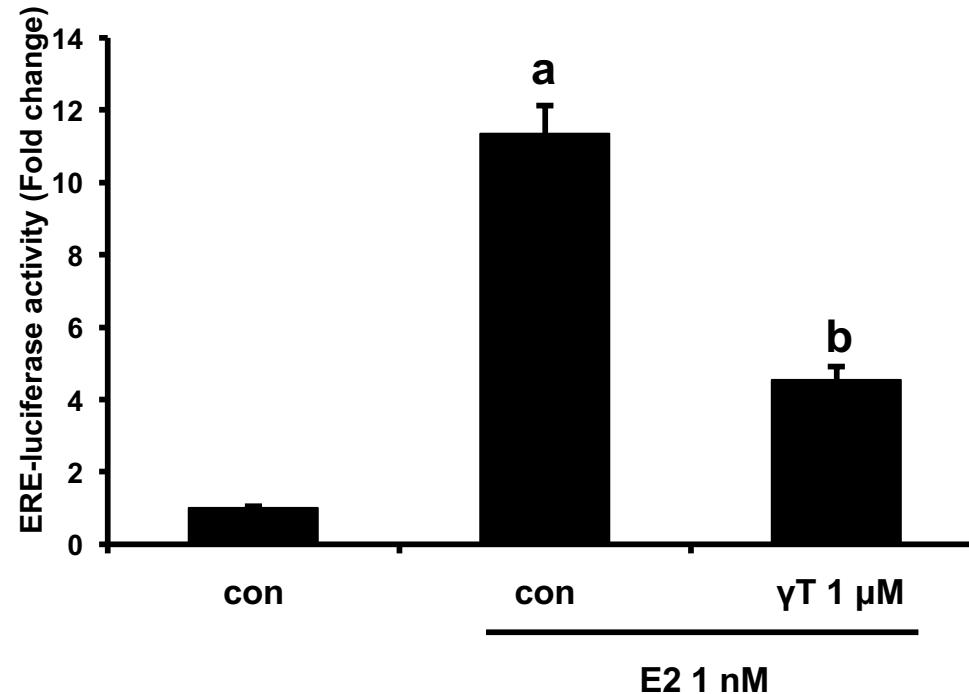

**Supplementary Figure S7.** Effects of estrogen and/or  $\gamma$ -tocopherol on ERE-luciferase activity in MCF-7 cells. Cells were transfected with the ERE-TATA-luc reporter plasmid for 24 h and then cells were treated with estrogen (E2, 1 nM) and/or  $\gamma$ -tocopherol (1  $\mu$ M) for an additional 12 h. The data are represented as mean  $\pm$  standard deviation (SD). n=3 independent experiments, <sup>a,b</sup> significantly different from the control and E2, respectively (p<0.05).
